# Supplementary material for: Strong Alterations in the Sphingolipid Profile of Chickens Fed a Dose of Fumonisins Considered Safe
Source: MDPI journal article supplement (doi:10.3390/toxins13110770), 2021-10-30
Supplement: s1 [file s1]

Supplementary

# Strong Alterations in the Sphingolipid Profile of Chickens Fed a Dose of Fumonisin Considered Safe

Didier Tardieu <sup>1</sup>, Maria Matard-Mann <sup>2</sup>, Pi Nyvall Collén <sup>2</sup> and Philippe Guerre <sup>1,\*</sup>

<sup>1</sup> National Veterinary School of Toulouse, ENVT, Université de Toulouse, F-31076 Toulouse, France; didier.tardieu@envt.fr

<sup>2</sup> Olmix S.A., ZA du Haut du Bois, F-56580 Bréhan, France; mmatar@olmix.com (M.M.-M.); pnyvallcollen@olmix.com (P.N.C.)

\* Correspondence: philippe.guerre@envt.fr

**Table S1.** Linearity of the method in net solvent and recovery of 33 standards measured in liver.

| Analyte <sup>1</sup> | Net solvent       |        |                   | Liver             |                |                  |                   |                |                  |                   |                |                  |                   |                |                  |                   |                |                  |
|----------------------|-------------------|--------|-------------------|-------------------|----------------|------------------|-------------------|----------------|------------------|-------------------|----------------|------------------|-------------------|----------------|------------------|-------------------|----------------|------------------|
|                      | Conc <sup>2</sup> | a      | (R <sup>2</sup> ) | Conc <sup>3</sup> | R <sup>4</sup> | RSD <sup>5</sup> | Conc <sup>3</sup> | R <sup>4</sup> | RSD <sup>5</sup> | Conc <sup>3</sup> | R <sup>4</sup> | RSD <sup>5</sup> | Conc <sup>3</sup> | R <sup>4</sup> | RSD <sup>5</sup> | Conc <sup>3</sup> | R <sup>4</sup> | RSD <sup>5</sup> |
| 1dSo                 | 0.1-12            | 1.0833 | 0.9998            | 16                | 81             | 9                | 31                | 75             | 8                | 63                | 73             | 8                | 125               | 71             | 8                | 250               | 83             | 15               |
| 1dSa                 | 0.1-12            | 1.074  | 0.9999            | 16                | 99             | 14               | 31                | 100            | 33               | 63                | 105            | 17               | 125               | 85             | 12               | 250               | 91             | 9                |
| d18:1 (So)           | 125-4000          | 1.0015 | 0.9985            | 5000              | 115            | 34               | 10000             | 111            | 8                | 20000             | 111            | 6                | 40000             | 120            | 8                | 80000             | 91             | 12               |
| d18:0 (Sa)           | 16-1000           | 1.077  | 0.9949            | 625               | 157            | 15               | 1250              | 169            | 21               | 2500              | 172            | 5                | 5000              | 150            | 4                | 10000             | 135            | 4                |
| 18:1/2:0             | 2-125             | 0.9911 | 0.9998            | 78                | 104            | 26               | 156               | 105            | 17               | 313               | 104            | 14               | 625               | 103            | 5                | 1250              | 103            | 4                |
| 18:0/2:0             | 2-250             | 0.9898 | 0.9996            | 156               | 122            | 6                | 313               | 106            | 10               | 625               | 123            | 18               | 1250              | 115            | 8                | 2500              | 115            | 10               |
| d18:1_P              | 63-1000           | 0.9982 | 0.9994            | 1250              | 141            | 57               | 2500              | 103            | 40               | 5000              | 100            | 9                | 10000             | 110            | 13               | 20000             | 139            | 6                |
| d18:0_P              | 63-1000           | 1.0155 | 0.9925            | 1250              | 123            | 16               | 2500              | 124            | 11               | 5000              | 119            | 21               | 10000             | 146            | 7                | 20000             | 171            | 6                |
| GluSo                | 1-125             | 1.0064 | 0.9998            | 156               | 110            | 22               | 313               | 120            | 10               | 625               | 107            | 13               | 1250              | 108            | 13               | 2500              | 126            | 3                |
| LysoSM               | 1-63              | 1.0018 | 0.9998            | 78                | 107            | 21               | 156               | 112            | 12               | 313               | 115            | 7                | 625               | 108            | 7                | 1250              | 113            | 6                |
| 18:1/14:0            | 4-250             | 0.9186 | 0.9975            | 313               | 119            | 8                | 625               | 100            | 8                | 1250              | 105            | 8                | 2500              | 107            | 8                | 5000              | 81             | 14               |
| 18:1/16:0            | 500-32000         | 1.0013 | 1                 | 80000             | 82             | 19               | 160000            | 88             | 16               | 320000            | 89             | 20               | 640000            | 85             | 13               |                   |                |                  |
| 18:0/16:0            | 125-4000          | 0.8859 | 0.9987            | 10000             | 112            | 11               | 20000             | 110            | 9                | 40000             | 129            | 13               | 80000             | 123            | 21               |                   |                |                  |

|              |            |        |        |       |     |    |       |     |    |        |     |    |        |     |    |        |     |    |
|--------------|------------|--------|--------|-------|-----|----|-------|-----|----|--------|-----|----|--------|-----|----|--------|-----|----|
| 18:1/18:0    | 125-4000   | 0.9913 | 0.9993 | 10000 | 97  | 8  | 20000 | 98  | 25 | 40000  | 108 | 14 | 80000  | 72  | 14 |        |     |    |
| 18:1/20:0    | 125-2000   | 1      | 0.9997 | 5000  | 115 | 25 | 10000 | 131 | 19 | 20000  | 128 | 19 | 40000  | 119 | 22 |        |     |    |
| 18:1/16:0_P  | 125-2000   | 1.0004 | 0.9996 | 5000  | 24  | 16 | 10000 | 40  | 11 | 20000  | 54  | 2  | 40000  | 81  | 17 | 80000  | 78  | 12 |
| 18:1/22:0    | 1000-16000 | 1.0018 | 0.9994 | 40000 | 82  | 20 | 80000 | 91  | 9  | 160000 | 75  | 12 | 320000 | 76  | 17 |        |     |    |
| LacSo        | 1-63       | 1.0003 | 0.9999 | 39    | 85  | 12 | 78    | 111 | 16 | 156    | 108 | 14 | 313    | 114 | 9  | 625    | 100 | 8  |
| 18:1/24:1    | 1000-16000 | 0.9834 | 0.9978 | 40000 | 89  | 23 | 80000 | 94  | 17 | 160000 | 67  | 18 | 320000 | 65  | 20 |        |     |    |
| 18:1/24:0    | 125-8000   | 0.9897 | 0.9985 | 20000 | 64  | 14 | 40000 | 70  | 9  | 80000  | 67  | 8  | 160000 | 66  | 20 |        |     |    |
| 18:0/24:0    | 8-2000     | 0.9918 | 0.9992 | 2500  | 35  | 22 | 5000  | 47  | 21 | 10000  | 53  | 15 | 20000  | 55  | 14 | 40000  | 74  | 6  |
| SM18:1/14:0  | 2-500      | 0.9098 | 0.9974 | 156   | 71  | 27 | 625   | 79  | 10 | 1250   | 70  | 7  | 2500   | 72  | 3  | 5000   | 91  | 9  |
| Glu18:1/16:0 | 63-4000    | 0.9846 | 0.9983 | 2500  | 81  | 10 | 5000  | 92  | 18 | 10000  | 75  | 14 | 20000  | 82  | 5  | 40000  | 87  | 6  |
| SM18:1/16:0  | 500-16000  | 0.9753 | 0.999  | 20000 | 94  | 33 | 40000 | 60  | 16 | 80000  | 60  | 10 | 160000 | 86  | 5  | 320000 | 65  | 15 |
| SM18:1/18:1  | 4-500      | 1.0131 | 0.9995 | 313   | 56  | 20 | 625   | 55  | 30 | 1250   | 57  | 6  | 2500   | 52  | 10 | 5000   | 51  | 2  |
| SM18:1/18:0  | 500-32000  | 0.975  | 0.9987 | 20000 | 120 | 14 | 40000 | 103 | 6  | 80000  | 88  | 3  | 160000 | 100 | 8  | 320000 | 105 | 11 |
| SM18:1/20:0  | 125-4000   | 1      | 0.9998 | 20000 | 112 | 34 | 40000 | 80  | 11 | 80000  | 78  | 3  | 160000 | 104 | 14 | 320000 | 78  | 11 |
| SM18:1/22:0  | 250-16000  | 1.003  | 1      | 40000 | 69  | 18 | 80000 | 72  | 19 | 160000 | 106 | 19 | 320000 | 80  | 15 |        |     |    |
| Glu18:1/24:1 | 31-1000    | 1.0035 | 0.9988 | 2500  | 115 | 15 | 5000  | 84  | 29 | 10000  | 93  | 17 | 20000  | 98  | 10 | 40000  | 86  | 14 |
| SM18:1/24:1  | 500-32000  | 1.009  | 0.9999 | 40000 | 109 | 32 | 80000 | 73  | 5  | 160000 | 80  | 6  | 320000 | 104 | 15 | 640000 | 104 | 12 |
| SM18:1/24:0  | 63-4000    | 0.9926 | 0.9996 | 10000 | 78  | 27 | 20000 | 71  | 19 | 40000  | 98  | 14 | 80000  | 89  | 16 |        |     |    |
| Lac18:1/16:0 | 31-2000    | 1.001  | 0.9997 | 2500  | 118 | 24 | 5000  | 123 | 7  | 10000  | 87  | 15 | 20000  | 100 | 5  | 40000  | 96  | 11 |
| Lac18:1/24:1 | 16-1000    | 0.9915 | 0.9993 | 1250  | 107 | 24 | 2500  | 139 | 5  | 5000   | 102 | 17 | 10000  | 108 | 8  | 20000  | 120 | 14 |

<sup>1</sup>Recovery (R) was calculated by correcting the concentrations measured by the R measured for each representative IS. The IS representative of the different standards were d17:1 for d18:1\_dOH and d18:1, d17:1 for d18:0\_dOH and d18:0; d17:1\_P for d18:1\_P; d17:0\_P for d18:0\_P; 18:1/12:0 for 18:1/14:0, 18:1/16:0, 18:0/16:0, and 18:1/18:0; 18:1/25:0 for 18:1/20:0, 18:1/22:0, 18:1/24:1, 18:1/24:0 and 18:0/24:0; SM18:1/12:0 for SM18:1/14:0, SM18:1/16:0, SM18:1/18:1, SM18:1/18:0, SM18:1/20:0, SM18:1/22:0, SM18:1/24:1, and SM18:1/24:0; Glu18:1/12:0 for Glu18:1/16:0 and Glu18:1/24:1; Lac18:1/12:0 for Lac18:1/16:0 and Lac18:1/24:1. No correction by IS was used for 18:1/2:0, 18:0/2:0, GluSo, LysoSM, and LacSo. <sup>2</sup>Conc = concentration expressed in pmol/mL, the ratio of each concentration tested was 2, n = 4 per concentration <sup>3</sup>Conc = concentration expressed in pmol/g, n = 4 <sup>4</sup>R = Recovery, expressed in %, n = 4. <sup>5</sup>RSD = relative standard deviation, expressed in %, n = 4.

**Table S2.** Linearity of the method for net solvent and recovery of 33 standards measured in plasma.

| Analyte <sup>1</sup> | Net solvent       |        |                   | Plasma            |                |                  |                   |                |                  |                   |                |                  |                   |                |                  |                   |                |                  |
|----------------------|-------------------|--------|-------------------|-------------------|----------------|------------------|-------------------|----------------|------------------|-------------------|----------------|------------------|-------------------|----------------|------------------|-------------------|----------------|------------------|
|                      | Conc <sup>2</sup> | a      | (R <sup>2</sup> ) | Conc <sup>3</sup> | R <sup>4</sup> | RSD <sup>5</sup> | Conc <sup>3</sup> | R <sup>4</sup> | RSD <sup>5</sup> | Conc <sup>3</sup> | R <sup>4</sup> | RSD <sup>5</sup> | Conc <sup>3</sup> | R <sup>4</sup> | RSD <sup>5</sup> | Conc <sup>3</sup> | R <sup>4</sup> | RSD <sup>5</sup> |
| 1dSo                 | 0.1-12            | 1.0833 | 0.9998            | 2                 | 88             | 12               | 4                 | 86             | 5                | 8                 | 76             | 6                | 16                | 73             | 1                | 31                | 82             | 5                |
| 1dSa                 | 0.1-12            | 1.074  | 0.9999            | 2                 | 67             | 20               | 4                 | 64             | 16               | 8                 | 63             | 10               | 16                | 68             | 5                | 31                | 78             | 9                |
| d18:1 (So)           | 16-500            | 0.8317 | 0.9905            | 313               | 111            | 5                | 625               | 117            | 4                | 1250              | 119            | 4                | 2500              | 114            | 2                |                   |                |                  |
| d18:0 (Sa)           | 8-500             | 0.9953 | 0.9998            | 156               | 115            | 5                | 313               | 121            | 4                | 625               | 107            | 10               | 1250              | 98             | 2                | 2500              | 106            | 12               |
| 18:1/2:0             | 2-125             | 0.9911 | 0.9998            | 20                | 88             | 10               | 39                | 85             | 10               | 78                | 83             | 4                | 156               | 84             | 5                | 313               | 82             | 6                |
| 18:0/2:0             | 2-250             | 0.9898 | 0.9996            | 39                | 90             | 11               | 78                | 90             | 6                | 156               | 86             | 8                | 313               | 81             | 4                | 625               | 84             | 5                |
| d18:1_P              | 63-1000           | 0.9982 | 0.9994            | 625               | 204            | 27               | 1250              | 227            | 8                | 2500              | 194            | 6                | 5000              | 172            | 7                |                   |                |                  |
| d18:0_P              | 63-1000           | 1.0155 | 0.9925            | 313               | 260            | 16               | 625               | 289            | 7                | 1250              | 278            | 3                | 2500              | 231            | 8                | 5000              | 258            | 7                |
| GluSo                | 1-125             | 1.0064 | 0.9998            | 10                | 96             | 19               | 20                | 100            | 10               | 39                | 86             | 8                | 78                | 86             | 6                | 156               | 97             | 10               |
| LysoSM               | 1-63              | 1.0018 | 0.9998            | 10                | 182            | 10               | 20                | 162            | 12               | 39                | 136            | 9                | 78                | 134            | 7                | 156               | 131            | 8                |
| 18:1/14:0            | 1-63              | 1.0138 | 0.9996            | 20                | 69             | 13               | 39                | 72             | 17               | 78                | 76             | 10               | 156               | 75             | 5                | 313               | 91             | 12               |
| 18:1/16:0            | 125-8000          | 0.9996 | 0.9999            | 2500              | 119            | 15               | 5000              | 112            | 12               | 10000             | 109            | 6                | 20000             | 98             | 13               | 40000             | 96             | 16               |
| 18:0/16:0            | 16-1000           | 0.9954 | 0.9993            | 313               | 91             | 17               | 625               | 84             | 5                | 1250              | 107            | 13               | 2500              | 97             | 9                | 5000              | 108            | 21               |
| 18:1/18:0            | 16-1000           | 0.9945 | 0.9999            | 313               | 108            | 11               | 625               | 91             | 9                | 1250              | 99             | 12               | 2500              | 89             | 8                | 5000              | 99             | 17               |
| 18:1/20:0            | 8-500             | 0.9891 | 0.9997            | 156               | 78             | 25               | 313               | 77             | 18               | 625               | 98             | 19               | 1250              | 88             | 7                | 2500              | 106            | 19               |
| 18:1/16:0_P          | 125-2000          | 1.0004 | 0.9996            | 313               | 74             | 37               | 625               | 98             | 15               | 1250              | 105            | 16               | 2500              | 111            | 4                | 5000              | 113            | 6                |
| 18:1/22:0            | 63-8000           | 0.9864 | 0.9986            | 1250              | 93             | 11               | 2500              | 81             | 15               | 5000              | 78             | 13               | 10000             | 73             | 8                | 20000             | 85             | 22               |
| LacSo                | 1-63              | 1.0003 | 0.9999            | 10                | 145            | 8                | 20                | 122            | 18               | 39                | 103            | 18               | 78                | 91             | 7                | 156               | 91             | 17               |
| 18:1/24:1            | 125-8000          | 0.8936 | 0.9961            | 2500              | 99             | 27               | 5000              | 121            | 15               | 10000             | 87             | 14               | 20000             | 103            | 19               | 40000             | 130            | 9                |
| 18:1/24:0            | 63-4000           | 1.0093 | 0.9995            | 1250              | 115            | 20               | 2500              | 125            | 8                | 5000              | 100            | 5                | 10000             | 98             | 23               | 20000             | 111            | 4                |
| 18:0/24:0            | 8-2000            | 0.9918 | 0.9992            | 156               | 129            | 25               | 313               | 118            | 12               | 625               | 101            | 2                | 1250              | 84             | 14               | 2500              | 90             | 13               |
| SM18:1/14:0          | 2-500             | 0.9098 | 0.9974            | 156               | 88             | 29               | 313               | 70             | 15               | 625               | 73             | 14               | 1250              | 87             | 4                |                   |                |                  |
| Glu18:1/16:0         | 31-1000           | 0.9986 | 0.9999            | 313               | 124            | 11               | 625               | 93             | 14               | 1250              | 74             | 10               | 2500              | 63             | 13               | 5000              | 77             | 20               |
| SM18:1/16:0          | 500-16000         | 0.9753 | 0.999             | 10000             | 99             | 23               | 20000             | 73             | 30               | 40000             | 88             | 7                |                   |                |                  |                   |                |                  |
| SM18:1/18:1          | 4-500             | 1.0131 | 0.9995            | 156               | 62             | 43               | 313               | 69             | 15               | 625               | 55             | 5                | 1250              | 63             | 11               | 2500              | 68             | 5                |
| SM18:1/18:0          | 500-32000         | 0.975  | 0.9987            | 5000              | 97             | 44               | 10000             | 84             | 18               | 20000             | 68             | 17               | 40000             | 70             | 15               | 80000             | 85             | 5                |
| SM18:1/20:0          | 125-4000          | 1      | 0.9998            | 625               | 93             | 32               | 1250              | 90             | 8                | 2500              | 73             | 12               | 5000              | 76             | 20               | 10000             | 89             | 5                |
| SM18:1/22:0          | 250-16000         | 1.003  | 1                 | 2500              | 113            | 15               | 5000              | 93             | 12               | 10000             | 71             | 13               | 20000             | 73             | 21               | 40000             | 90             | 10               |
| Glu18:1/24:1         | 31-1000           | 1.0035 | 0.9988            | 156               | 103            | 23               | 313               | 92             | 21               | 625               | 72             | 10               | 1250              | 52             | 13               | 2500              | 66             | 11               |
| SM18:1/24:1          | 500-32000         | 1.009  | 0.9999            | 5000              | 100            | 17               | 10000             | 78             | 7                | 20000             | 69             | 14               | 40000             | 78             | 18               | 80000             | 85             | 9                |
| SM18:1/24:0          | 63-4000           | 0.9926 | 0.9996            | 625               | 112            | 27               | 1250              | 93             | 6                | 2500              | 68             | 21               | 5000              | 69             | 28               | 10000             | 82             | 10               |

|              |         |        |        |     |     |    |     |     |    |      |    |    |      |    |    |      |    |    |
|--------------|---------|--------|--------|-----|-----|----|-----|-----|----|------|----|----|------|----|----|------|----|----|
| Lac18:1/16:0 | 31-2000 | 1.001  | 0.9997 | 313 | 97  | 9  | 625 | 79  | 22 | 1250 | 80 | 7  | 2500 | 65 | 8  | 5000 | 68 | 16 |
| Lac18:1/24:1 | 16-1000 | 0.9915 | 0.9993 | 156 | 134 | 19 | 313 | 124 | 2  | 625  | 94 | 13 | 1250 | 72 | 16 | 2500 | 98 | 25 |

<sup>1</sup> Recovery (R) was calculated by correcting the concentrations measured with the R measured for each representative IS. The IS representative of the different standards were d17:1 for d18:1\_dOH and d18:1, d17:1 for d18:0\_dOH and d18:0; d17:1\_P for d18:1\_P; d17:0\_P for d18:0\_P; 18:1/12:0 for 18:1/14:0, 18:1/16:0, 18:0/16:0, and 18:1/18:0; 18:1/25:0 for 18:1/20:0, 18:1/22:0, 18:1/24:1, 18:1/24:0 and 18:0/24:0; SM18:1/12:0 for SM18:1/14:0, SM18:1/16:0, SM18:1/18:1, SM18:1/18:0, SM18:1/20:0, SM18:1/22:0, SM18:1/24:1, and SM18:1/24:0; Glu18:1/12:0 for Glu18:1/16:0 and Glu18:1/24:1; Lac18:1/12:0 for Lac18:1/16:0 and Lac18:1/24:1. No correction by IS was used for 18:1/2:0, 18:0/2:0, GluSo, LysoSM, and LacSo. <sup>2</sup> Conc = concentration expressed in pmol/mL, the ratio between each concentration tested is 2, n = 4 per concentration <sup>3</sup> Conc = concentration expressed in pmol/mL, n = 4. <sup>4</sup> R = Recovery, expressed in %, n = 4. <sup>5</sup> RSD = relative standard deviation, expressed in %, n = 4.

**Table S3.** Signal suppression and enhancement (SSE) of some analytes measured in liver and plasma<sup>1</sup>

| Analyte     | Liver                      |         |         | Plasma                     |         |         |
|-------------|----------------------------|---------|---------|----------------------------|---------|---------|
|             | Concentration <sup>2</sup> | SSE (%) | RSD (%) | Concentration <sup>2</sup> | SSE (%) | RSD (%) |
| d18:0 (Sa)  | 2500-20000                 | 66      | 12      | 313-5000                   | 67      | 16      |
| d18:1_P     | 2500-20000                 | 326     | 6       | 1250-5000                  | 287     | 12      |
| d18:0_P     | 2500-20000                 | 470     | 10      | 625-5000                   | 442     | 13      |
| LysoSM      | 80-625                     | 162     | 7       | 39-156                     | 188     | 11      |
| 18:0/24:0   | 1250-20000                 | 113     | 2       | 313-5000                   | 103     | 3       |
| SM18:1/18:1 | 625-10000                  | 95      | 3       | 313-2500                   | 97      | 11      |

<sup>1</sup>SSE was measured using the “one point area” method as described in materials and methods for the IS. <sup>2</sup>Range of concentration for the analytes spiked after the extraction, expressed in pmol/g liver or pmol/ml plasma. The concentration ratio between each level tested is 2, n=4 per concentration.

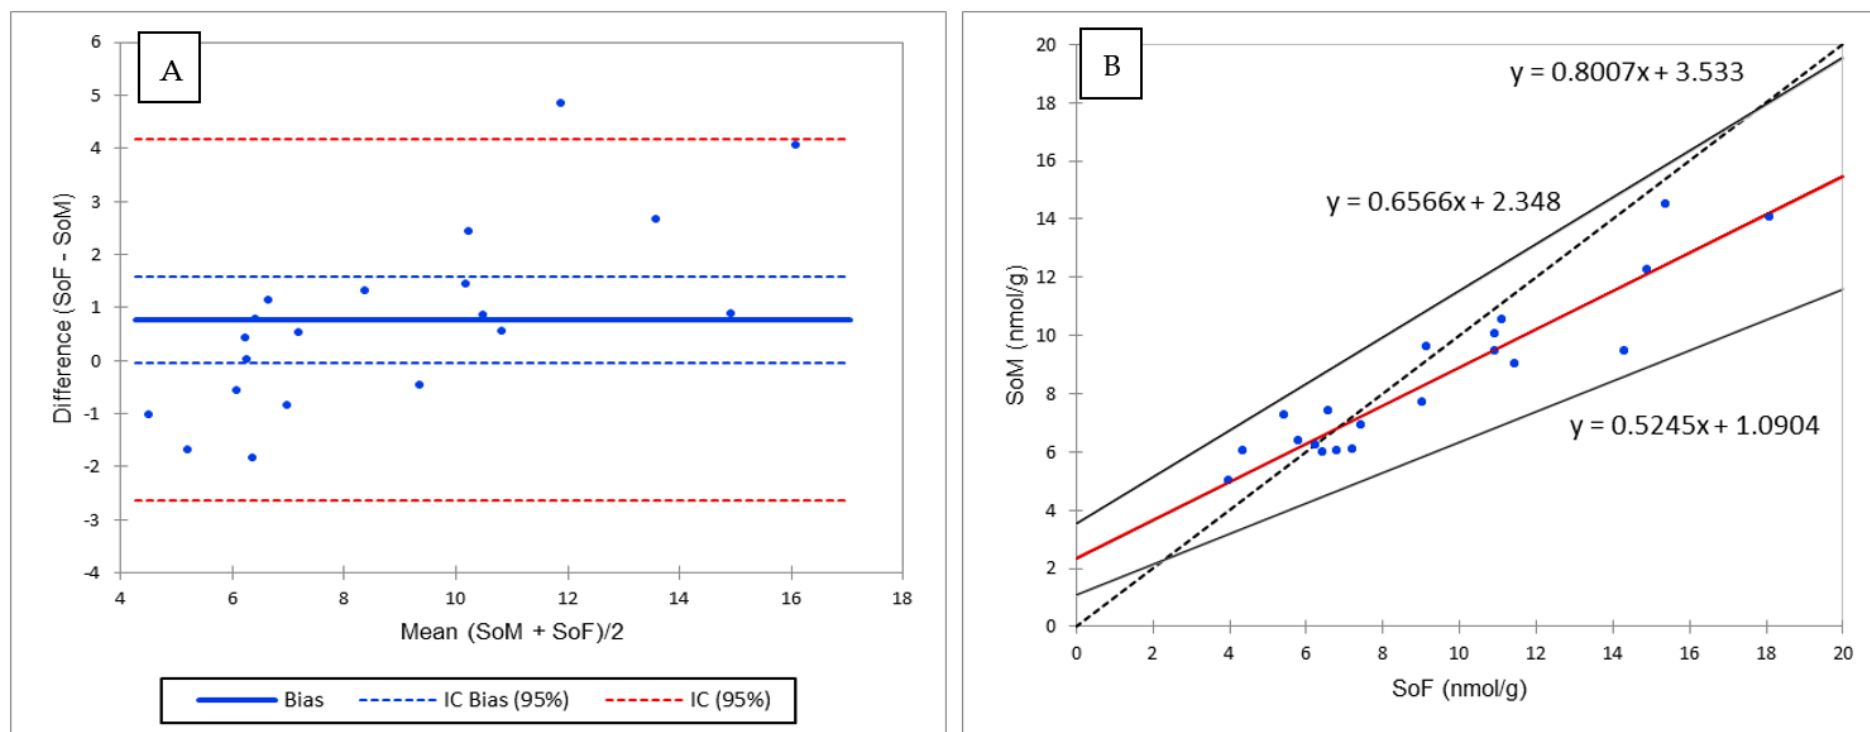

**Figure S1.** Comparison of sphingosine concentrations in liver measured by fluorescence detection (SoF) and mass detection (SoM). (A) Passing and Bablok regression; (B) Bland-Altman comparison.

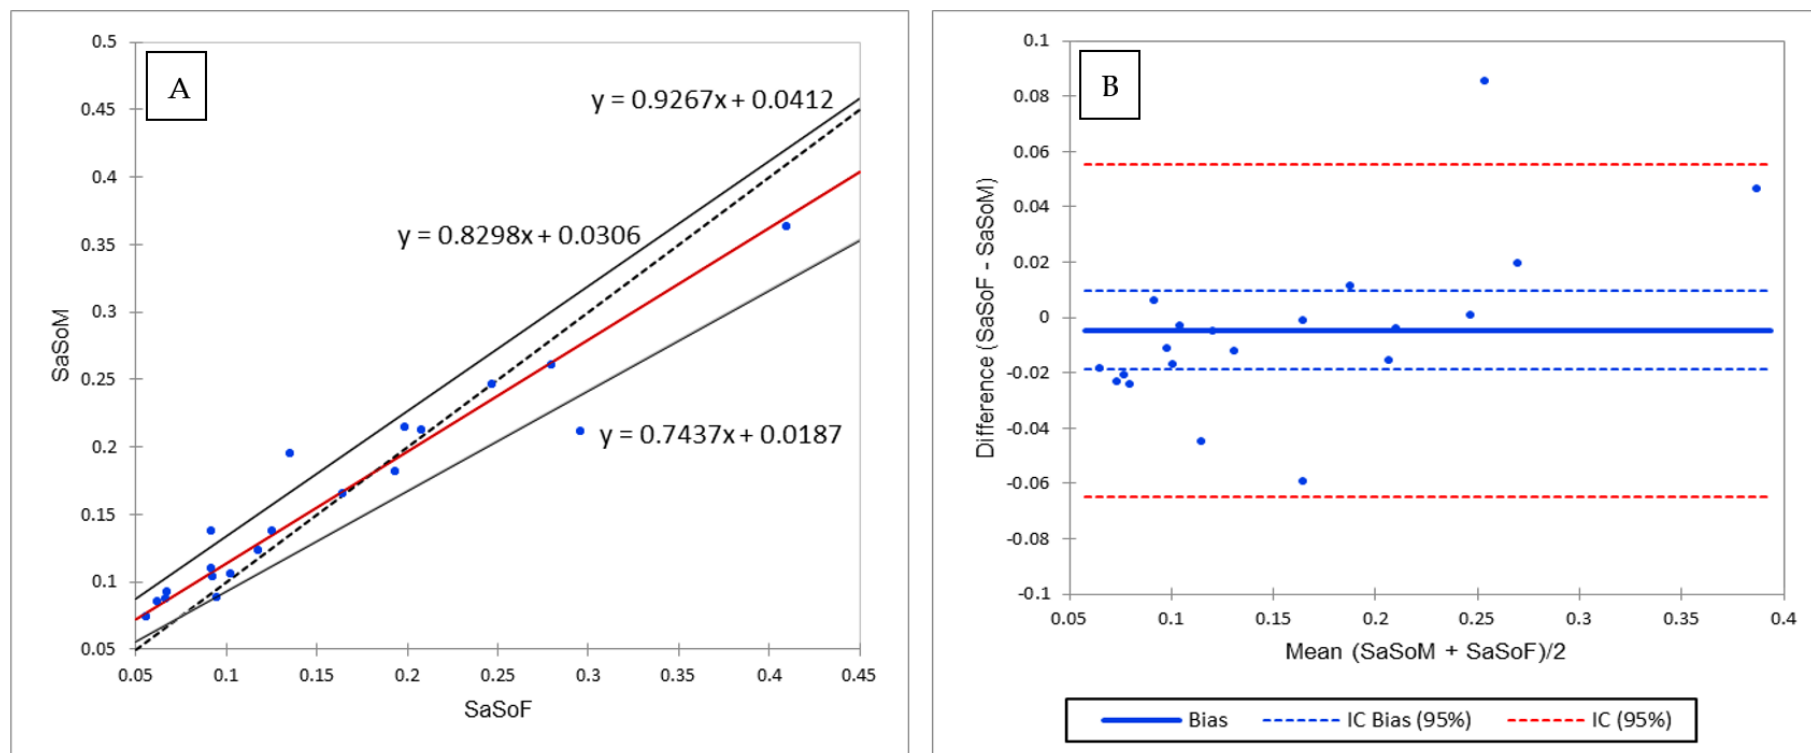

**Figure S2.** Comparison of the sphinganine to sphingosine ratio in liver measured by fluorescence detection (SaSoF) and mass detection (SaSoM). (A) Passing and Bablok regression; (B) Bland-Altman comparison.

| Confusion matrix for the training sample (Variable Groups) : Liver  |    |    |       |           |
|---------------------------------------------------------------------|----|----|-------|-----------|
| From \ To                                                           | V  | Y  | Total | % correct |
| V                                                                   | 10 | 0  | 10    | 100.00%   |
| Y                                                                   | 0  | 10 | 10    | 100.00%   |
| Total                                                               | 10 | 10 | 20    | 100.00%   |
| Confusion matrix for the training sample (Variable Groups) : plasma |    |    |       |           |
| From \ To                                                           | V  | Y  | Total | % correct |
| V                                                                   | 10 | 0  | 10    | 100.00%   |
| Y                                                                   | 0  | 10 | 10    | 100.00%   |
| Total                                                               | 10 | 10 | 20    | 100.00%   |

**Figure S3.** Confusion matrix for the training sample of the PLS regression performed on variables representative of the effect of FB on SL in liver and plasma.

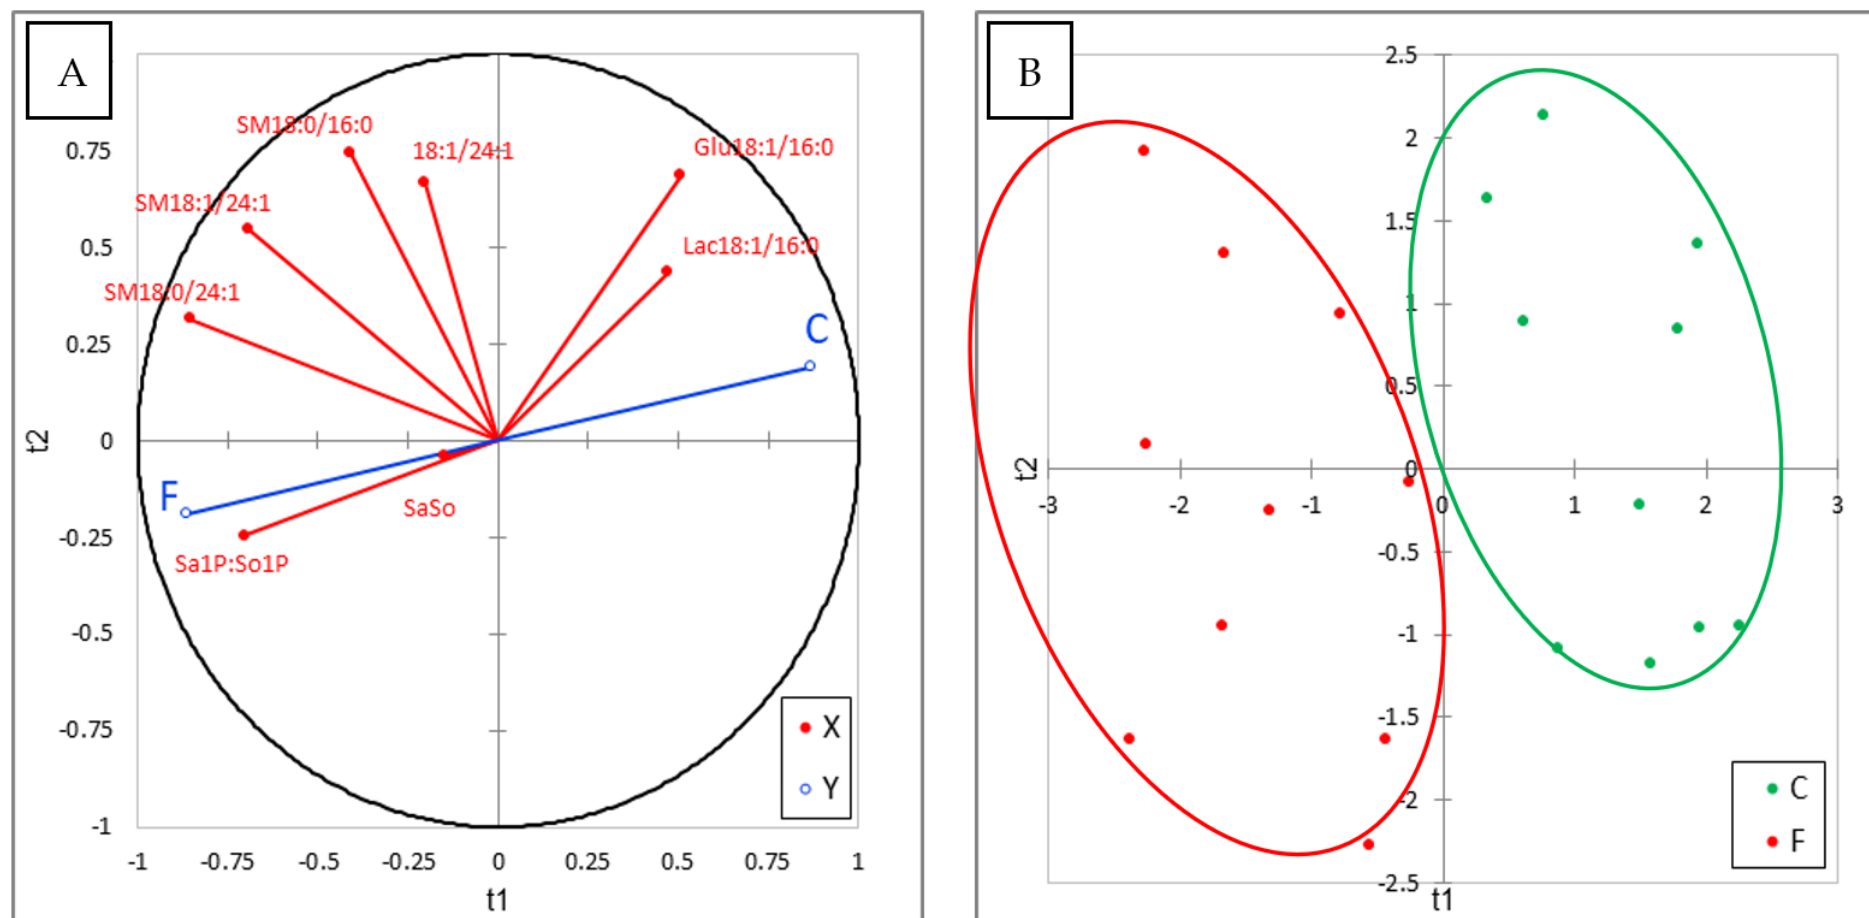

**Figure S4.** Partial least square discriminant analysis (PLS-DA) performed on 6 SL, Sa:So ratio and Sa1P:So1P ratio measured in the livers of control chickens (C) not exposed to fumonisins and chickens fed for 9 days with 20 mg FB1+FB2/kg (F). (A) Correlation plot between the explanatory (X) and dependent (Y) variables. (B) Discrimination on the factor axes extracted from the original explanatory variables.  $R^2X = 0.567$ ,  $R^2Y = 0.787$ ,  $Q^2 = 0.735$ .
